# Supplementary material for: Comparison of Rapid Antigen Tests for COVID-19
Source: PubMed Central journal article supplement (PMC7764512; doi:10.3390/v12121420), 2020-12-10
Supplement: viruses-12-01420-s001.pdf [file viruses-12-01420-s001.pdf]

**Table S1.** List of specimens and results

| ID       | Specimen                | Days post-onset<br>sample obtained | Cq value of<br>RT-qPCR | Standard Q<br>COVID-19 Ag | Espline<br>SARS-CoV-2 | QuickNavi<br>-COVID19 Ag | ImmunoAce<br>SARS-CoV-2 | Infectious virus<br>isolation |
|----------|-------------------------|------------------------------------|------------------------|---------------------------|-----------------------|--------------------------|-------------------------|-------------------------------|
| SUCo-015 | Nasal vestibule<br>swab | 1                                  | 34.8                   | -                         | -                     | -                        | -                       | -                             |
| HPCo-049 | Saliva                  | 1                                  | 22.7                   | ±                         | ±                     | -                        | -                       | +                             |
| HPCo-040 | N swab                  | 2                                  | 23.2                   | +                         | +                     | -                        | +                       | +                             |
| SUCo-014 | N swab                  | 2                                  | 19.7                   | +                         | +                     | +                        | +                       | +                             |
| HPCo-070 | Saliva                  | 2                                  | 18.8                   | +                         | +                     | ±                        | +                       | +                             |
| HPCo-038 | Saliva                  | 3                                  | 28.7                   | -                         | -                     | -                        | -                       | +                             |
| HPCo-038 | N swab                  | 3                                  | 20.0                   | +                         | +                     | +                        | +                       | +                             |
| HPCo-071 | Saliva                  | 4                                  | 27.9                   | -                         | -                     | -                        | +                       | -                             |
| HPCo-070 | Saliva                  | 4                                  | 26.1                   | +                         | +                     | +                        | +                       | +                             |
| HPCo-050 | Saliva                  | 4                                  | 24.8                   | -                         | ±                     | -                        | +                       | +                             |
| HPCo-038 | Saliva                  | 4                                  | 24.7                   | +                         | +                     | -                        | +                       | +                             |
| HPCo-049 | N swab                  | 4                                  | 23.4                   | +                         | +                     | ±                        | +                       | +                             |
| HPCo-053 | N swab                  | 4                                  | 23.2                   | +                         | +                     | ±                        | +                       | +                             |
| TKCo-007 | Saliva                  | 4                                  | 20.7                   | +                         | +                     | +                        | +                       | +                             |
| HPCo-038 | Saliva                  | 5                                  | 29.4                   | -                         | -                     | -                        | -                       | -                             |
| HPCo-070 | Saliva                  | 5                                  | 28.3                   | +                         | +                     | -                        | +                       | -                             |
| HPCo-057 | Saliva                  | 5                                  | 27.3                   | -                         | -                     | -                        | -                       | -                             |
| HPCo-073 | Saliva                  | 5                                  | 25.4                   | ±                         | +                     | -                        | +                       | -                             |
| HPCo-054 | Saliva                  | 5                                  | 25.3                   | -                         | -                     | -                        | -                       | -                             |
| HPCo-054 | N swab                  | 5                                  | 25.3                   | -                         | -                     | -                        | -                       | +                             |

|          |                   |   |      |   |   |   |   |   |
|----------|-------------------|---|------|---|---|---|---|---|
| TKCo-007 | Saliva            | 5 | 23.4 | + | + | + | + | + |
| NCCo-001 | T Swab            | 6 | 33.6 | - | - | - | - | - |
| HPCo-056 | Saliva            | 6 | 27.9 | - | - | - | - | + |
| TKCo-007 | Saliva            | 6 | 27.5 | - | - | - | - | - |
| SUCo-007 | N swab            | 6 | 23.1 | + | + | ± | + | + |
| HPCo-040 | N swab            | 6 | 21.1 | + | + | - | + | + |
| FSCo-001 | Tracheal aspirate | 6 | 20.4 | + | + | + | - | - |
| TKCo-007 | Saliva            | 7 | 33.0 | - | - | - | - | - |
| HPCo-016 | Gargle lavage     | 7 | 29.7 | - | - | - | - | - |
| SUCo-006 | N swab            | 7 | 29.6 | - | - | - | - | - |
| HPCo-049 | N swab            | 7 | 29.0 | - | - | - | - | - |
| TKCo-001 | Gargle lavage     | 7 | 28.8 | - | - | - | - | - |
| HPCo-056 | Saliva            | 7 | 27.1 | - | - | - | - | - |
| HPCo-053 | N swab            | 7 | 27.1 | - | - | - | - | - |
| HPCo-073 | Saliva            | 7 | 26.3 | - | - | - | - | - |
| FSCo-007 | Tracheal aspirate | 7 | 24.9 | + | - | - | + | - |
| HPCo-070 | Saliva            | 7 | 24.6 | - | + | - | ± | + |
| TKCo-010 | Saliva            | 7 | 20.7 | + | + | ± | + | + |
| FSCo-005 | Tracheal aspirate | 8 | 27.8 | - | - | - | - | - |
| HPCo-056 | N swab            | 8 | 27.4 | - | - | - | - | - |
| HPCo-058 | Saliva            | 8 | 27.2 | - | - | - | - | - |
| TKCo-001 | Gargle lavage     | 8 | 26.3 | - | - | - | - | - |
| HPCo-050 | Saliva            | 8 | 25.1 | - | - | - | ± | - |
| HPCo-042 | N swab            | 8 | 24.6 | + | + | - | - | - |
| FSCo-001 | Tracheal aspirate | 8 | 24.1 | - | ± | - | - | - |

|          |                   |    |      |   |   |   |   |   |
|----------|-------------------|----|------|---|---|---|---|---|
| HPCo-070 | Saliva            | 8  | 21.8 | + | + | - | + | + |
| SUCo-017 | N swab            | 9  | 33.0 | - | - | - | - | - |
| HPCo-042 | N swab            | 9  | 30.8 | - | - | - | - | - |
| HPCo-015 | Gargle lavage     | 9  | 30.0 | - | - | - | - | - |
| HPCo-054 | N swab            | 9  | 29.4 | - | - | - | - | + |
| HPCo-038 | N swab            | 9  | 26.2 | - | - | - | - | + |
| NCCo-002 | T Swab            | 9  | 25.8 | - | - | - | - | + |
| HPCo-070 | Saliva            | 10 | 22.8 | + | + | ± | + | - |
| HPCo-015 | Gargle lavage     | 11 | 33.3 | - | - | - | - | - |
| HPCo-058 | Saliva            | 11 | 31.0 | - | - | - | - | - |
| FSCo-004 | Tracheal aspirate | 11 | 19.6 | + | + | + | ± | - |
| HPCo-015 | Gargle lavage     | 12 | 36.0 | - | - | - | - | - |
| FSCo-004 | Tracheal aspirate | 13 | 28.4 | - | - | - | - | - |
| HPCo-074 | Saliva            | 13 | 27.2 | - | - | - | - | - |
| FSCo-003 | Tracheal aspirate | 13 | 21.5 | + | + | + | + | + |
| HPCo-051 | N swab            | 14 | 26.8 | - | - | - | - | - |
| FSCo-006 | Tracheal aspirate | 15 | 26.5 | + | + | + | + | - |
| FSCo-004 | Tracheal aspirate | 15 | 24.4 | - | - | - | - | - |
| FSCo-003 | Tracheal aspirate | 15 | 22.5 | + | + | + | - | - |
| HPCo-015 | Gargle lavage     | 16 | 28.7 | - | - | - | - | - |
| SUCo-002 | Sputum            | 16 | 19.9 | + | + | + | + | - |
| FSCo-003 | Tracheal aspirate | 17 | 31.6 | - | - | - | - | - |
| FSCo-006 | Tracheal aspirate | 17 | 28.4 | - | - | - | - | - |
| FSCo-004 | Tracheal aspirate | 17 | 26.6 | - | - | - | - | - |
| FSCo-002 | Tracheal aspirate | 17 | 26.3 | - | - | - | - | - |

|          |                   |    |      |   |   |   |   |   |   |
|----------|-------------------|----|------|---|---|---|---|---|---|
| FSCo-004 | Tracheal aspirate | 19 | 35.6 | - | - | - | - | - | - |
| SUCo-002 | Sputum            | 20 | 28.2 | - | - | - | - | - | - |
| FSCo-004 | Tracheal aspirate | 21 | 28.7 | + | - | - | - | - | - |
| SUCo-004 | Sputum            | 22 | 34.3 | - | - | - | - | - | - |
| SUCo-002 | Sputum            | 24 | 23.4 | - | - | - | - | - | - |
| FSCo-001 | Tracheal aspirate | 28 | 25.0 | - | + | ± | - | - | - |

**Table S2.** Sensitivity of rapid antigen tests for stock viruses

| Test                   | Virus titer of NC02 <sup>a</sup> tested (PFU) |      |      |      |      | Virus titer of HP72 <sup>b</sup> tested (PFU) |                   |      |      |      |      |      |
|------------------------|-----------------------------------------------|------|------|------|------|-----------------------------------------------|-------------------|------|------|------|------|------|
|                        | 7500                                          | 750  | 500  | 250  | 75   | 7500                                          | 5000              | 2500 | 750  | 500  | 250  | 75   |
| RT-qPCR                | 18.0 <sup>c</sup>                             | 21.7 | 22.2 | 23.1 | 25.4 | 16.9                                          | 17.8              | 18.8 | 20.4 | 21.1 | 22.7 | 24.0 |
| Standard Q COVID-19 Ag | + <sup>d</sup>                                | +    | +    | +    | -    | +                                             | n.d. <sup>e</sup> | n.d. | +    | +    | +    | -    |
| Espline SARS-CoV-2     | +                                             | +    | +    | -    | -    | +                                             | n.d.              | n.d. | +    | +    | +    | -    |
| QuickNavi -COVID19 Ag  | +                                             | +    | -    | -    | -    | +                                             | +                 | -    | -    | n.d. | n.d. | -    |
| ImmunoAce SARS-CoV-2   | +                                             | +    | +    | +    | -    | +                                             | +                 | -    | -    | n.d. | n.d. | -    |

UT-NCGM02/Human/2020/Tokyo<sup>a</sup> and UT-HP072/Human/2020/Tokyo<sup>b</sup> were examined with each RAT according to the manufacturers' instructions.

<sup>c</sup>Average Cq value of RT-qPCR (n=2).

<sup>d</sup>Two independent experiments were performed: '+' indicates both were positive, '-' indicates both were negative.

<sup>e</sup>Not done.
